# Supplementary material for: Potential Involvement of Peripheral Leptin/STAT3 Signaling in the Effects of Resveratrol and Its Metabolites on Reducing Body Fat Accumulation
Source: PubMed Central journal article supplement (PMC6265754; doi:10.3390/nu10111757), 2018-11-14
Supplement: nutrients-10-01757-s001.pdf [file nutrients-10-01757-s001.pdf]

**Supplemental data for:**

# **Potential Involvement of Peripheral Leptin/STAT3 Signaling in the Effects of Resveratrol and its Metabolites on Reducing Body Fat Accumulation**

*Andrea Ardid-Ruiz<sup>1</sup>, Maria Ibars<sup>1</sup>, Pedro Mena<sup>2</sup>, Daniele Del Rio<sup>3,4,5</sup>, Begoña Muguerza<sup>1</sup>, Cinta Bladé<sup>1</sup>, Lluís Arola<sup>1,6</sup>, Gerard Aragonès<sup>\*,1</sup>, Manuel Suárez<sup>1</sup>*

<sup>1</sup>Universitat Rovira i Virgili, Department of Biochemistry and Biotechnology, Nutrigenomics Research Group, Tarragona, Spain; <sup>2</sup>Human Nutrition Unit, Department of Food and Drugs, University of Parma, Parma, Italy; <sup>3</sup> Department of Veterinary Medicine, University of Parma, Parma, Italy; <sup>4</sup>School for Advanced Studies on Food and Nutrition, University of Parma, Italy; <sup>5</sup>Microbiome Research Hub, University of Parma; <sup>6</sup>Technological Unit of Nutrition and Health, EURECAT-Technological Center of Catalonia, Reus, Spain.

\*Corresponding author: Gerard Aragonès, Universitat Rovira i Virgili, Department of Biochemistry and Biotechnology, Marcel·lí Domingo 1, 43007, Tarragona, Spain. Tel.: +34-977-558-188; Fax: 34-977-558-232; E-mail: [gerard.aragones@urv.cat](mailto:gerard.aragones@urv.cat)

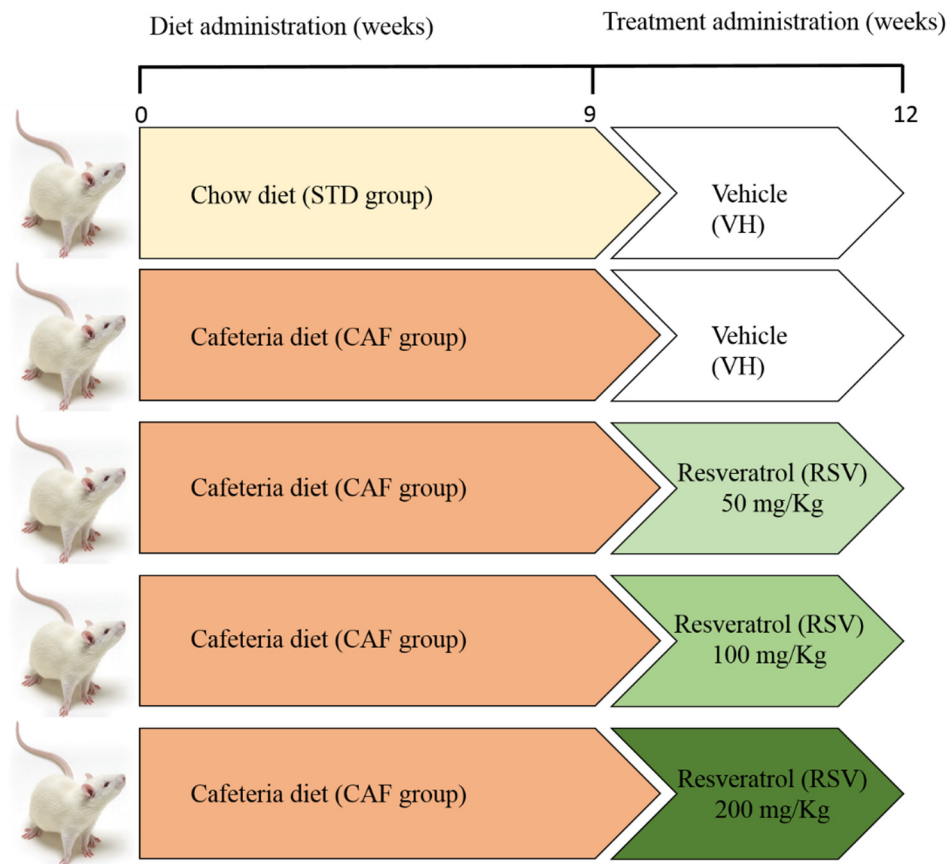

**Figure S1.** A scheme of the distribution of animals in the study. Each group was composed of 6 rats. During the first nine weeks, one group was fed the standard chow diet (STD group), whereas the other group was fed the cafeteria diet (CAF group). After nine weeks, the animals were orally administered either vehicle (VH) or resveratrol (RSV) + VH at three doses (50, 100 and 200 mg/kg). On week twelve, the animals were sacrificed. CAF: cafeteria diet; RSV: resveratrol; STD: standard chow diet; VH: vehicle.

**Table S1.** A summary of the rat-specific primer sequences used for qRT-PCR analysis.

| Primer name  | Direction | Primer sequences (5'-3') | Primer length (nucleotides) | T <sub>m</sub> (°C) | Amplicon length (nucleotides) |
|--------------|-----------|--------------------------|-----------------------------|---------------------|-------------------------------|
| <i>Acc</i>   | FW        | gcggtctggaggtatatgt      | 20                          | 51                  | 156                           |
|              | RV        | tctgtttagcgtggggatgt     | 20                          | 52                  |                               |
| <i>Atf4</i>  | FW        | attcttgcagcctcttccct     | 20                          | 52                  | 213                           |
|              | RV        | aggtaggactcagggctcat     | 20                          | 49                  |                               |
| <i>Chop</i>  | FW        | tactcttgaccctgcatccc     | 20                          | 51                  | 170                           |
|              | RV        | actgaccactctgtttccgt     | 20                          | 48                  |                               |
| <i>Cpt1b</i> | FW        | tcatgtatcgccgcaaactg     | 20                          | 55                  | 199                           |
|              | RV        | agccaaacctgaagaagcg      | 20                          | 54                  |                               |
| <i>Fas</i>   | FW        | tggtgatagccggtatgtcc     | 20                          | 52                  | 153                           |
|              | RV        | tcagcttccagaccgctta      | 20                          | 53                  |                               |
| <i>iNos</i>  | FW        | gtaccctcagttctgtgcct     | 20                          | 48                  | 220                           |
|              | RV        | tgttgcggttgaagtgtagc     | 20                          | 51                  |                               |
| <i>Pgc1a</i> | FW        | gtggatgaagacggattgcc     | 20                          | 54                  | 219                           |
|              | RV        | ggtgtggtttgcatggttct     | 20                          | 52                  |                               |
| <i>Ppara</i> | FW        | aacggcgttgaaaacaagga     | 20                          | 55                  | 191                           |
|              | RV        | aaggaggacagcatcgtgaa     | 20                          | 52                  |                               |
| <i>Ppia</i>  | FW        | cttcgagctgtttgcagaaa     | 21                          | 53                  | 138                           |
|              | RV        | aagtcaccaccctggcacatg    | 21                          | 57                  |                               |
| <i>Ptp1b</i> | FW        | ccctttgaccacagtcgga      | 20                          | 55                  | 119                           |
|              | RV        | ttggtaaagggccctgggtg     | 20                          | 58                  |                               |
| <i>Scd1</i>  | FW        | tgggttgccagtttctttcg     | 20                          | 55                  | 192                           |
|              | RV        | accacaagaagccacgttcc     | 20                          | 52                  |                               |
| <i>Socs3</i> | FW        | ctggaccattcgggagttc      | 20                          | 56                  | 148                           |
|              | RV        | ctgggagctaccgaccattg     | 20                          | 54                  |                               |
| <i>Ucp2</i>  | FW        | agaccattgcacgagagaa      | 20                          | 52                  | 156                           |
|              | RV        | aagggaggtcgtcgttcatg     | 20                          | 51                  |                               |
| <i>Ucp3</i>  | FW        | acgccattgtcaattgtgct     | 20                          | 53                  | 179                           |
|              | RV        | agcgttcatgtatcgggtct     | 20                          | 51                  |                               |
| <i>sXbp1</i> | FW        | ttaaggacacgcttggggat     | 20                          | 54                  | 193                           |
|              | RV        | gcaacagcgtcagaatccat     | 20                          | 52                  |                               |

Abbreviations: *Acc* (acetyl-CoA carboxylase), *Atf4* (activating transcription factor 4), *Chop* (DNA damage inducible transcript 3), *Cpt1b* (carnitine palmitoyltransferase 1b), *Fas* (fatty acid synthase), *iNos* (inducible nitric oxide synthase), *Pgc1a* (peroxisome proliferator-activated receptor gamma coactivator 1-alpha), *Ppara* (peroxisome proliferator activated receptor alpha), *Ppia* (peptidylprolyl isomerase a), *Ptp1b* (protein-tyrosine phosphatase 1b), *Scd1* (stearoyl-CoA desaturase 1), *Socs3* (suppressor of cytokine signalling 3), *Ucp2* (mitochondrial uncoupling protein 2), *Ucp3* (mitochondrial uncoupling protein 3), *sXbp1* (spliced x-box binding protein 1).

**Table S2.** Chromatographic and fragmentation characteristics of RSV metabolites identified by UHPLC-MS<sup>n</sup> in serum samples.

| Metabolite                                          | Abbreviation | RT<br>(min) | [M-H] <sup>-</sup><br>(m/z) | MS <sup>2</sup> ions (m/z)      | MS <sup>3</sup> ions<br>(m/z)        | MS <sup>4</sup> ions<br>(m/z) |
|-----------------------------------------------------|--------------|-------------|-----------------------------|---------------------------------|--------------------------------------|-------------------------------|
| <i>trans</i> -resveratrol                           | RSV          | 2.89        | <b>227</b>                  | 185, 183, 159, 157, 143,<br>141 |                                      |                               |
| resveratrol-4'-sulfate                              | R4S          | 2.30        | <b>307</b>                  | 227, 261                        | 185, 183, 159, 157                   |                               |
| resveratrol-3-sulfate <sup>a</sup>                  | R3S          | 3.45        | <b>307</b>                  | 227, 243                        | 185, 183, 159, 157                   |                               |
| resveratrol-4'-glucuronide <sup>b</sup>             | R4G          | 2.57        | <b>403</b>                  | <i>175, 227</i>                 | 175: 113; 227: 185,<br>183, 159, 157 |                               |
| resveratrol-3-glucuronide                           | R3G          | 2.75        | <b>403</b>                  | <i>175, 227</i>                 | 175: 113; 227: 185,<br>183, 159, 157 |                               |
| resveratrol-disulfate <sup>a</sup>                  | RDS          | 3.89        | <b>387</b>                  | 307, 369                        | 227                                  | 185, 183,<br>159, 157         |
| resveratrol-glucuronide-sulfate <sup>b</sup>        | RSG          | 2.25        | <b>483</b>                  | 307, 403, 227                   | 227                                  | 185, 183,<br>159, 157         |
| resveratrol-diglucuronide <sup>b</sup>              | RDG          | 1.31        | <b>579</b>                  | 403                             |                                      |                               |
| dihydroresveratrol                                  | DRSV         | 3.29        | <b>229</b>                  | 123                             |                                      |                               |
| dihydroresveratrol-sulfate <sup>c</sup>             | DRS          | 2.84        | <b>309</b>                  | 229                             | 123                                  |                               |
| dihydroresveratrol-glucuronide <sup>c</sup>         | DRG          | 2.24        | <b>405</b>                  | 175, 229                        | 123                                  |                               |
| dihydroresveratrol-glucuronide-sulfate <sup>c</sup> | DRSG         | 2.25        | <b>485</b>                  | 309, 405                        | 229                                  | 123, 187                      |

MS<sup>2</sup> and MS<sup>3</sup> ions in italic were those subjected to MS<sup>3</sup> and MS<sup>4</sup> fragmentation for unambiguous identification. <sup>a</sup> Quantified as R4S equivalents <sup>b</sup> Quantified as R3G equivalents <sup>c</sup> Quantified as DRSV equivalents.

**Table S3.** Biochemical parameters of liver, calf skeletal muscle and eWAT.

|                        | STD         | CAF                      | CAF + RSV 50 mg/Kg       | CAF + RSV 100 mg/Kg       | CAF + RSV 200 mg/Kg      |
|------------------------|-------------|--------------------------|--------------------------|---------------------------|--------------------------|
| <b>Liver</b>           |             |                          |                          |                           |                          |
| Weight (%)             | 2.92 ± 0.12 | 2.94 ± 0.07              | 3.16 ± 0.04              | 3.11 ± 0.13               | 3.18 ± 0.07              |
| TAG (mg/g)             | 6.81 ± 1.20 | 6.80 ± 0.59              | 5.31 ± 0.33              | 10.92 ± 0.72 <sup>#</sup> | 5.25 ± 0.67              |
| TC (mg/g)              | 1.85 ± 0.04 | 3.28 ± 0.33 <sup>*</sup> | 2.38 ± 0.26 <sup>ε</sup> | 3.76 ± 0.25 <sup>#</sup>  | 2.66 ± 0.29 <sup>ε</sup> |
| <b>Skeletal muscle</b> |             |                          |                          |                           |                          |
| Weight (%)             | 0.60 ± 0.01 | 0.45 ± 0.01 <sup>*</sup> | 0.44 ± 0.03              | 0.47 ± 0.01               | 0.51 ± 0.02              |
| TAG (mg/g)             | 0.12 ± 0.01 | 0.12 ± 0.01              | 0.08 ± 0.02 <sup>ε</sup> | 0.03 ± 0.01 <sup>#</sup>  | 0.04 ± 0.01 <sup>#</sup> |
| TC (mg/g)              | 0.49 ± 0.06 | 0.54 ± 0.05 <sup>φ</sup> | 0.25 ± 0.05 <sup>#</sup> | 0.22 ± 0.06 <sup>#</sup>  | 0.24 ± 0.04 <sup>#</sup> |
| <b>eWAT</b>            |             |                          |                          |                           |                          |
| Weight (%)             | 2.04 ± 0.16 | 3.97 ± 0.27 <sup>*</sup> | 4.07 ± 0.35              | 3.42 ± 0.16               | 2.91 ± 0.21 <sup>#</sup> |
| TAG (mg/g)             | 2.38 ± 0.09 | 2.56 ± 0.10              | 2.57 ± 0.14              | 3.04 ± 0.15 <sup>#</sup>  | 2.57 ± 0.11              |
| TC (mg/g)              | 0.47 ± 0.05 | 0.67 ± 0.07 <sup>φ</sup> | 0.82 ± 0.12              | 0.89 ± 0.15               | 0.50 ± 0.07              |

Data are expressed as a mean ± SEM, n=6. <sup>\*</sup>  $p < 0.05$  and <sup>φ</sup>  $p < 0.1$ , T-student comparing CAF group respect to STD group. <sup>#</sup>  $p < 0.05$  and <sup>ε</sup>  $p < 0.1$ , T-student comparing RSV groups respect to CAF group. Abbreviations: CAF: cafeteria diet; eWAT: epididymal white adipose tissue; RSV: resveratrol; STD: standard chow diet; TAG: triacylglycerol; TC: total cholesterol.

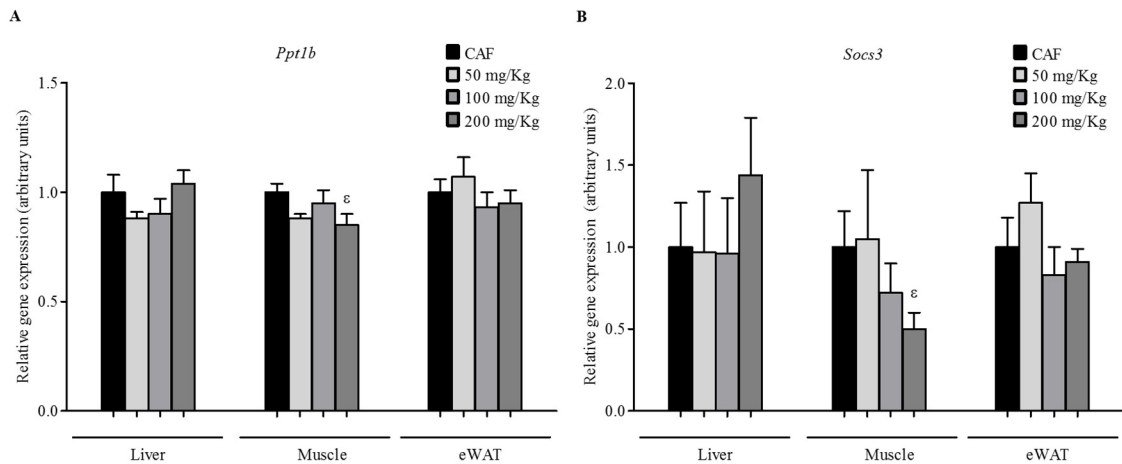

**Figure S2.** Inhibitors of the leptin signaling. The rats were fed the STD or CAF diet for 9 weeks. Then, the STD and CAF rats were treated orally with RSV (50, 100 or 200 mg per kg of body wt) or vehicle for 3 weeks. (A) *Ptp1b* gene expression; (B) *Socs3* gene expression. Data are expressed as the mean  $\pm$  SEM, n=6. #  $p < 0.05$  and  $\epsilon p < 0.1$ , Student's t-test comparing the RSV group with the CAF group. CAF: cafeteria diet; eWAT: epididymal white adipose tissue; RSV: resveratrol; VH: vehicle; wt: weight. *Ptp1b* (protein-tyrosine phosphatase 1b); *Socs3* (suppressor of cytokine signaling 3).

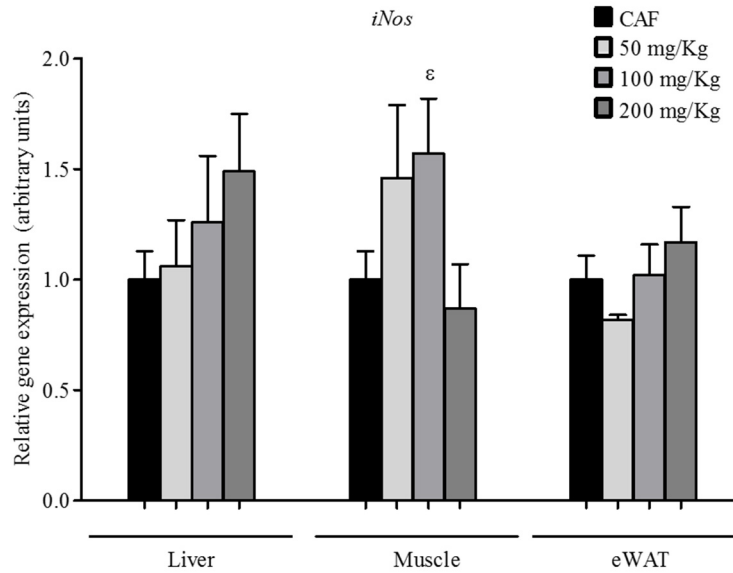

**Figure S3.** *iNos* gene expression. The rats were fed the STD or CAF diet for 9 weeks. Then, the STD and CAF rats were treated orally with RSV (50, 100 or 200 mg per kg of body wt) or vehicle for 3 weeks. Data are expressed as a mean  $\pm$  SEM,  $n=6$ . <sup>#</sup> $p < 0.05$  and <sup>ε</sup> $p < 0.1$ , Student's t-test comparing the RSV group with the CAF group. CAF: cafeteria diet; eWAT: epididymal white adipose tissue; RSV: resveratrol; *iNos* (inducible nitric oxide synthase).

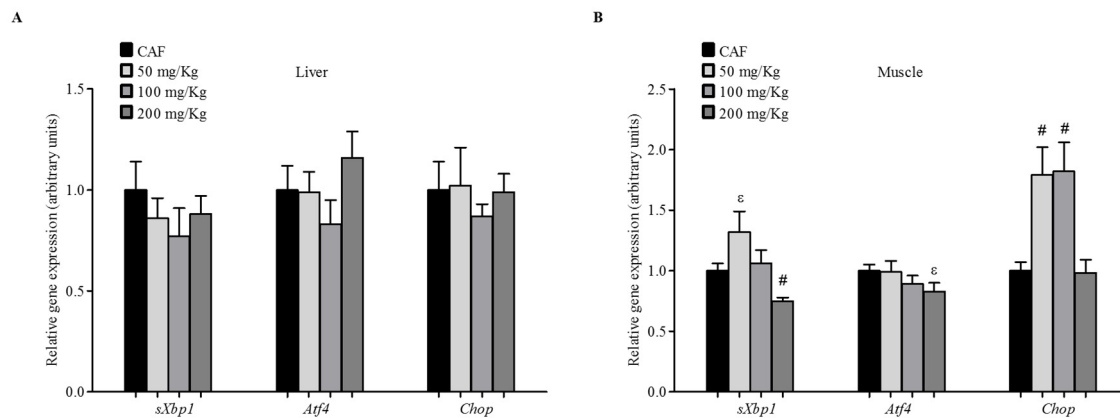

**Figure S4.** Gene expression of ER-stress markers. The rats were fed the STD or CAF diet for 9 weeks. Then, the STD and CAF rats were treated orally with RSV (50, 100 or 200 mg per kg of body wt) or vehicle for 3 weeks. (A) liver and (B) skeletal muscle.. Data are expressed as the mean  $\pm$  SEM, n=6. #  $p < 0.05$  and  $\epsilon p < 0.1$ , Student's t-test comparing the RSV group with the CAF group. CAF: cafeteria diet; RSV: resveratrol; Atf4 (activating transcription factor 4), Chop (DNA damage inducible transcript 3), sXbp1 (spliced x-box binding protein 1).



**Table S4.** Correlation analysis of the most relevant biochemical parameters and the metabolites concentrations of RSV present in the serum of rats treated with 50, 100 or 200 mg/kg RSV.

|                   | <b>RSV Metabolites (<math>\mu</math>M)</b> | <b>Body wt gain (g)</b> | <b>Total body fat content (%)</b> | <b>Serum leptin (ng/mL)</b> | <b>LSI Liver</b> | <b>LSI Muscle</b> | <b>LSI eWAT</b> |
|-------------------|--------------------------------------------|-------------------------|-----------------------------------|-----------------------------|------------------|-------------------|-----------------|
| <b>Phase II</b>   | <b>R4G</b>                                 | ns                      | -0.67 *                           | -0.66 *                     | 0.72 *           | 0.69 *            | 0.79 *          |
|                   | <b>R3G</b>                                 | ns                      | ns                                | ns                          | ns               | ns                | ns              |
|                   | <b>RDG</b>                                 | ns                      | ns                                | ns                          | 0.60 #           | ns                | ns              |
|                   | <b>R4S</b>                                 | ns                      | -0.60 #                           | ns                          | ns               | 0.81 *            | 0.79 *          |
|                   | <b>R3S</b>                                 | ns                      | -0.76 *                           | -0.60 #                     | ns               | ns                | ns              |
|                   | <b>RDS</b>                                 | ns                      | ns                                | ns                          | ns               | ns                | 0.67 #          |
|                   | <b>RSG</b>                                 | ns                      | ns                                | ns                          | ns               | 0.67 #            | ns              |
| <b>Microbiota</b> | <b>DRG</b>                                 | ns                      | ns                                | ns                          | 0.60 #           | ns                | ns              |
|                   | <b>DRS</b>                                 | ns                      | ns                                | ns                          | ns               | 0.69 *            | ns              |
|                   | <b>DRSG</b>                                | -0.66 *                 | ns                                | ns                          | ns               | 0.81 *            | 0.71 *          |

Data are expressed as a mean  $\pm$  SEM, n=6. Non-parametric Spearman test. \*  $p > 0.05$  and #  $p > 0.1$ . Abbreviations: eWAT: epididymal white adipose tissue; ns: non-significant; RSV: resveratrol; R4G: resveratrol-4'-glucuronide; R3G: resveratrol-3-glucuronide; R3S: resveratrol-3-sulfate; R4S: resveratrol-4'-sulfate; RDS: resveratrol-disulfate; RDG: resveratrol-diglucuronide; RSG: resveratrol-sulfate-glucuronide; DRG: dihydroresveratrol-glucuronide; DRS: dihydroresveratrol-sulfate; DRSG: dihydroresveratrol-sulfate-glucuronide.
